# Supplementary material for: Xpert Ultra on nasopharyngeal swabs detects one-third of pulmonary tuberculosis: a nested case-control study in South African primary care
Source: Research Square preprint supplement (doi:10.21203/rs.3.rs-10112219/v1), 2026-06-23
Supplement: Supplementary file 1 [file 54e85e368e51bc05085b6ab0.docx]

Table of contents

[Table S1. Comparison of the diagnostic performance of NPSU using wet vs dry swabs. wet swabs showed higher sensitivity but similar specificity to dry NPSs. Data are % (95% CI); n/N. 2](#_Toc232765700)

[Table S2. Demographic and clinical characteristics of participants with and without TSU results. Participants without TSU results were more likely to have negative sputum culture results; otherwise, the two groups were similar. Data are median (IQR) or n (%). 3](#_Toc232765701)

[Table S3. Standards for Reporting of Diagnostic Accuracy Studies check list 4](#_Toc232765702)

# Table S1. Comparison of the diagnostic performance of NPSU using wet vs dry swabs. wet swabs showed higher sensitivity but similar specificity to dry NPSs. Data are % (95% CI); n/N.

| **Group** | **Sensitivity** | | **Specificity** | |
| --- | --- | --- | --- | --- |
|  | **Wet** | **Dry** | **Wet** | **Dry** |
| Overall | 45 (34, 57); 34/75 | 21 (12, 34); 13/61  **†p=0.003** | 90 (79, 97); 46/51 | 86 (74, 94); 49/57  †p=0.499 |
| HIV-positive | 42 (25, 61); 13/31 | 6 (1, 21); 2/32  **†p<0.001** | 86 (64, 97); 18/21 | 84 (67, 95); 27/32  †p=0.894 |
| HIV-negative | 48 (32, 63); 21/44  ‡p=0.620 | 38 (21, 58); 11/29  **†**p=0.409  **‡p=0.003** | 93 (78, 99); 28/30  ‡p=0.502 | 88 (69, 97); 22/25  †p=0.493  ‡p=0.600 |
| Smear-positive | 57 (34, 78); 12/21 | 28 (14, 47); 9/32  **†p=0.028** |  |  |
| Smear-negative | 41 (28, 55); 22/54  **‡**p=0.200 | 14 (4, 32); 4/29  **†p=0.012**  ‡p=0.172 | 90 (78, 97); 45/50 | 86 (74, 94); 48/56  †p=0.502 |

Specificity could not be computed for the smear-positive subgroup because all participants had a positive reference standard result

†Within row p-values: wet vs. dry swabs

**‡**Within column p-values: HIV-negative vs. HIV-positive and sputum smear-positive vs smear-negative.

Bold font denotes p≤0.05.

Abbreviations: NPSU: nasopharyngeal swab Ultra.

# **Table S2. Demographic and clinical characteristics of participants with and without TSU results.** Participants without TSU results were more likely to have negative sputum culture results; otherwise, the two groups were similar. Data are median (IQR) or n (%).

| **Characteristic** | **Overall n=265** | **TSU not done n=142** | **TSU done n=123** | **p-value** |
| --- | --- | --- | --- | --- |
| *Demographics* |  |  |  |  |
| Age, years | 37 (29, 47) | 37 (28, 43) | 38 (31, 49) | 0.091 |
| Female | 118 (45) | 61 (43) | 57 (46) | 0.580 |
| BMI (kg/m2) | 19.9 (18.2, 23.7) | 20.0 (18.3, 22.9) | 19.9 (18, 25) | 0.904 |
| TBscore II | 2 (2, 3) | 2 (2, 3) | 2 (2, 4) | 0.393 |
| *Clinical* |  |  |  |  |
| PLHIV | 126 (48) | 68 (48) | 58 (47) | 0.905 |
| on ART | 65 (52) | 33 (49) | 32 (55) | 0.457 |
| Sputum culture-positive | 148 (56) | 91 (64) | 57 (46) | **0.004** |
| Culture time to positivity, days | 9 (6, 13) | 9 (6, 13) | 9 (6, 13) | 0.973 |
| Previous TB | 95 (36) | 49 (35) | 46 (37) | 0.625 |

p-values: participants with vs without TSU results, bold font denotes p≤0.05.

Abbreviations: ART: antiretroviral therapy, BMI: body mass index, IQR: interquartile range, PLHIV: people living with HIV, TBscore II: tuberculosis symptom score II, TSU: tongue swab Ultra.

# Table S3. Standards for Reporting of Diagnostic Accuracy Studies check list

| **Section & Topic** | **No** | **Item** | **Reported** |
| --- | --- | --- | --- |
| **TITLE OR ABSTRACT** | 1 | Identification as a study of diagnostic accuracy using at least one measure of accuracy (such as sensitivity, specificity, predictive values, or AUC). | Yes |
| **ABSTRACT** | 2 | Structured summary of study design, methods, results, and conclusions  (for specific guidance, see STARD for Abstracts). | Yes |
| **INTRODUCTION** | 3 | Scientific and clinical background, including the intended use and clinical role of the index test. | Yes |
|  | 4 | Study objectives and hypotheses. | Yes |
| **METHODS** |  |  |  |
| Study design | 5 | Whether data collection was planned before the index test and reference standard were performed (prospective study) or after (retrospective study). | Yes |
| Participants | 6 | Eligibility criteria | Yes |
|  | 7 | On what basis potentially eligible participants were identified (such as symptoms, results from previous tests, inclusion in registry). | Yes |
|  | 8 | Where and when potentially eligible participants were identified (setting, location, and dates). | Yes |
|  | 9 | Whether participants formed a consecutive, random or convenience series. | Yes |
| Test Methods | 10a | Index test, in sufficient detail to allow replication. | Yes |
|  | 10b | Reference standard, in sufficient detail to allow replication. | Yes |
|  | 10b | Rationale for choosing the reference standard (if alternatives exist). | Yes |
|  | 11 | Definition of and rationale for test positivity cut-offs or result categories of the index test, distinguishing pre-specified from exploratory. | Yes |
|  | 12a | Definition of and rationale for test positivity cut-offs or result categories of the reference standard, distinguishing pre-specified from exploratory. | Yes |
|  | 12b | Whether clinical information and reference standard results were available to the performers/readers of the index test. | Yes |
|  | 13a | Whether clinical information and index test results were available to the assessors of the reference standard. | Yes |
| Analysis | 14 | Methods for estimating or comparing measures of diagnostic accuracy. | Yes |
|  | 15 | How indeterminate index test or reference standard results were handled | Yes |
|  | 16 | How missing data on the index test and reference standard were handled | Yes |
|  | 17 | Any analyses of variability in diagnostic accuracy, distinguishing prespecified from exploratory | Yes |
|  | 18 | Intended sample size and how it was determined | Yes |
| **RESULTS** |  |  |  |
| Participants | 19 | Flow of participants, using a diagram | Yes |
|  | 20 | Baseline demographic and clinical characteristics of participants | Yes |
|  | 21a | Distribution of severity of disease in those with the target condition | Yes |
|  | 21b | Distribution of alternative diagnoses in those without the target condition | No  The primary study did not systematically investigate or record alternative diagnoses in people without TB. |
|  | 22 | Time interval and any clinical interventions between index test and reference standard | Yes |
| Test results | 23 | Cross tabulation of the index test results (or their distribution) by the results of the reference standard | Yes |
|  | 24 | Estimates of diagnostic accuracy and precision (such as 95% confidence intervals) | Yes |
|  | 25 | Any adverse events from performing the index test or the reference standard | No |
| **DISCUSSION** |  |  |  |
|  | 26 | Study limitations, including sources of potential bias, statistical uncertainty, and generalizability | Yes |
|  | 27 | Implications for practice, including the intended use and clinical role of the index test | Yes |
| **OTHER INFORMATION** |  |  |  |
|  | 28 | Registration number and name of registry | NA |
|  | 29 | Where the full study protocol can be accessed | NA  Study protocol was not published. |
|  | 30 | Sources of funding and other support; role of funders | Yes |
